# Supplementary material for: Do Old Age and Comorbidity via Non-Communicable Diseases Matter for COVID-19 Mortality? A Path Analysis
Source: Frontiers journal article supplement (doi:10.3389/fpubh.2021.736347), 2021-11-16
Supplement: Table_1.XLSX [file Table_1.XLSX]

## Sheet: Sheet1
countrycode	countryname	MAGE	A65	A70	GDPPC	TCPM	TDPM	TTPT	SI	NCDD	Africa	Asia	Europe	North_America	Oceania	South_America
ALB	Albania	38	13.188	8.643	11803.4	57733.3	908.131	256.537	59.0329	92.9178	0	0	1	0	0	0
ARG	Argentina	31.9	11.198	7.441	18933.9	115051	2516.61	304.541	73.7584	78.2958	0	0	0	0	0	1
AUS	Australia	37.9	15.504	10.129	44648.7	3642.83	46.843	1414.43	59.2381	89.5734	0	0	0	0	1	0
AUT	Austria	44.4	19.202	13.748	45436.7	80769.3	1210.1	9314.6	60.9388	91.9488	0	0	1	0	0	0
AZE	Azerbaijan	32.4	6.018	3.871	15847.4	46715.3	625.431	468.606	73.9582	88.1961	0	1	0	0	0	0
BHR	Bahrain	32.4	2.372	1.387	43290.7	157075	794.488	3622.66	59.4673	84.4278	0	1	0	0	0	0
BGD	Bangladesh	27.5	5.098	3.262	3523.98	9310.21	164.38	57.268	77.2545	63.7038	0	1	0	0	0	0
BLR	Belarus	40.3	14.799	9.788	17168	55517.9	429.319	872.501	34.3926	91.7819	0	0	1	0	0	0
BEL	Belgium	41.8	18.571	12.849	42658.6	105871	2195.86	1695.35	56.0819	85.9019	0	0	1	0	0	0
BLZ	Belize	25	3.853	2.279	7824.36	47982.9	985.392	597.232	68.5445	61.675	0	0	0	1	0	0
BEN	Benin	18.8	3.244	1.942	2064.24	1722.75	11.726	51.448	41.4827	36.8873	1	0	0	0	0	0
BTN	Bhutan	28.6	4.885	2.977	8708.6	3332.48	3.847	1459.4	69.877	69.4316	0	1	0	0	0	0
BOL	Bolivia	25.4	6.704	4.393	6885.83	42113.9	1579.32	203.756	59.5755	70.254	0	0	0	0	0	1
BIH	Bosnia and Herzegovina	42.5	16.569	10.711	11713.9	70542.3	3180.37	369.956	49.416	93.8701	0	0	1	0	0	0
BRA	Brazil	33.5	8.552	5.06	14103.5	99574	2770.95	148.213	65.0819	73.3699	0	0	0	0	0	1
BGR	Bulgaria	44.7	20.801	13.272	18563.3	70965.3	2950.71	678.519	48.1992	95.1678	0	0	1	0	0	0
KHM	Cambodia	25.6	4.412	2.385	3645.07	6291.53	128.405	135.101	50.9802	63.8303	0	1	0	0	0	0
CAN	Canada	41.4	16.984	10.797	44017.6	42093.5	725.966	1118.48	64.4462	88.6364	0	0	0	1	0	0
CHL	Chile	35.4	11.087	6.938	22767	85851.4	1947.18	1100.62	75.015	84.6786	0	0	0	0	0	1
CHN	China	38.7	10.641	5.929	15308.7	66.48	3.212	110.787	72.474	88.3413	0	1	0	0	0	0
COL	Colombia	32.2	7.646	4.312	13254.9	96493.3	2458.4	491.108	72.3255	73.3245	0	0	0	0	0	1
CRI	Costa Rica	33.6	9.468	5.694	15525	100920	1200.22	356.89	62.0561	81.0247	0	0	0	1	0	0
CIV	Cote d'Ivoire	18.7	2.933	1.582	3601.01	2201.48	21.661	36.668	35.2701	32.962	1	0	0	0	0	0
HRV	Croatia	44	19.724	13.053	22669.8	97134.6	2095.72	676.65	47.9654	92.7006	0	0	1	0	0	0
CYP	Cyprus	37.3	13.416	8.563	32415.1	132611	620.492	14534.6	63.3531	90.7245	0	0	1	0	0	0
DNK	Denmark	42.3	19.677	12.325	46682.5	61509.1	454.131	7027.79	52.0406	90.1347	0	0	1	0	0	0
DOM	Dominican Republic	27.6	6.981	4.419	14600.9	32529.7	368.003	185.123	71.0654	72.641	0	0	0	1	0	0
ECU	Ecuador	28.1	7.104	4.458	10581.9	28343.4	1826.09	95.974	67.7693	73.8297	0	0	0	0	0	1
SLV	El Salvador	27.6	8.273	5.417	7292.46	15651.5	483.547	136.928	56.6562	64.885	0	0	0	1	0	0
EST	Estonia	42.7	19.452	13.491	29481.3	114611	1010.42	1427.97	40.5043	92.8378	0	0	1	0	0	0
ETH	Ethiopia	19.8	3.526	2.063	1729.93	2870.01	44.886	29.005	57.2745	38.2775	1	0	0	0	0	0
FJI	Fiji	28.6	6.224	3.284	8702.98	55872.3	645.698	331.861	57.5115	84.1868	0	0	0	0	1	0
FIN	Finland	42.8	21.228	13.264	40585.7	24884.5	191.408	1264.54	44.6256	93.3228	0	0	1	0	0	0
GAB	Gabon	23.1	4.45	2.976	16562.4	12605.6	78.11	513.472	71.1923	45.5029	1	0	0	0	0	0
GMB	Gambia	17.5	2.339	1.417	1561.77	3981.2	134.302	43.157	53.4113	35.4321	1	0	0	0	0	0
GEO	Georgia	38.7	14.864	10.244	9745.08	151281	2188.82	2160.93	69.2745	92.4565	0	1	0	0	0	0
DEU	Germany	46.6	21.453	15.957	45229.2	49864.7	1112.15	873.409	62.6926	91.0462	0	0	1	0	0	0
GHA	Ghana	21.1	3.385	1.948	4227.63	3975.34	35.894	44.841	47.0765	42.8451	1	0	0	0	0	0
GRC	Greece	45.3	20.396	14.524	24574.4	61810.6	1408.38	1809.55	65.555	86.8109	0	0	1	0	0	0
GTM	Guatemala	22.9	4.694	3.016	7423.81	29700.2	725.539	134.948	63.9584	60.9542	0	0	0	1	0	0
HKG	Hong Kong	44.8	16.303	10.158	56054.9	1611.19	28.201	3341.17	62.7765			1
HUN	Hungary	43.4	18.577	11.976	26777.6	85066.8	3128.97	663.602	56.4957	93.3432	0	0	1	0	0	0
ISL	Iceland	37.3	14.431	9.207	46483	33766.3	96.109	1823.03	43.7599	89.6675	0	0	1	0	0	0
IND	India	28.2	5.989	3.414	6426.67	24109.8	320.342	400.72	71.9052	62.043	0	1	0	0	0	0
IDN	Indonesia	29.3	5.319	3.053	11188.7	15203.1	510.613	90.128	64.9641	73.0714	0	1	0	0	0	0
IRN	Iran	32.4	5.44	3.182	19082.6	64608.6	1393.74	369.729	64.5202	79.281	0	1	0	0	0	0
IRQ	Iraq	20	3.186	1.957	15664	48260.9	534.078	366.083	73.2094	55.6317	0	1	0	0	0	0
IRL	Ireland	38.7	13.928	8.678	67335.3	76405.2	1045.37	1459.23	67.0425	89.9654	0	0	1	0	0	0
ISR	Israel	30.6	11.733	7.359	33132.3	142706	865.892	3013.58	60.9492	85.617	0	1	0	0	0	0
ITA	Italy	47.9	23.021	16.24	35220.1	77026.7	2162.61	1498.95	68.3984	91.149	0	0	1	0	0	0
JAM	Jamaica	31.4	9.684	6.39	8193.57	27373.5	608.382	198.572	72.7868	79.2239	0	0	0	1	0	0
JPN	Japan	48.2	27.049	18.493	39002.2	13398.8	138.016	184.115	40.8718	81.5694	0	1	0	0	0	0
JOR	Jordan	23.2	3.81	2.361	8337.49	79607.1	1036.61	963.159	67.1483	75.0102	0	1	0	0	0	0
KAZ	Kazakhstan	30.6	6.991	4.625	24055.6	49880.7	816.164	629.908	71.5776	84.0231	0	1	0	0	0	0
KEN	Kenya	20	2.686	1.528	2993.03	4504.35	91.751	30.468	66.1528	34.1938	1	0	0	0	0	0
KWT	Kuwait	33.7	2.345	1.114	65530.5	95033.6	564.392	952.652	69.1641	72.9796	0	1	0	0	0	0
LAO	Laos	24.4	4.029	2.322	6397.36	2797.8	2.168	71.327	44.4133	59.3029	0	1	0	0	0	0
LVA	Latvia	43.9	19.754	14.136	25063.8	81788.1	1429.62	1788.74	49.8762	91.6898	0	0	1	0	0	0
LBN	Lebanon	31.1	8.514	5.43	13367.6	91673.5	1220.24	698.962	72.8046	87.3236	0	1	0	0	0	0
LTU	Lithuania	43.5	19.002	13.778	29524.3	119427	1809.02	1844.76	49.7081	89.6883	0	0	1	0	0	0
LUX	Luxembourg	39.7	14.312	9.842	94278	122379	1315.35	5524.16	48.4582	88.4732	0	0	1	0	0	0
MDG	Madagascar	19.6	2.929	1.686	1416.44	1509.04	33.7	8.632	56.835	42.7857	1	0	0	0	0	0
MWI	Malawi	18.1	2.979	1.783	1095.04	3127.75	115.484	15.766	50.9999	36.9963	1	0	0	0	0	0
MYS	Malaysia	29.9	6.293	3.407	26808.2	65800.1	753.016	778.935	64.3406	71.0098	0	1	0	0	0	0
MLT	Malta	42.4	19.426	11.324	36513.3	71998.8	886.187	2354.34	52.5419	90.5478	0	0	1	0	0	0
MRT	Mauritania	20.3	3.138	1.792	3597.63	7479.83	160.834	53.252	44.8954	33.6381	1	0	0	0	0	0
MEX	Mexico	29.3	6.857	4.321	17336.5	27705.5	2104.52	76.542	55.7939	79.8132	0	0	0	1	0	0
MDA	Moldova	37.6	10.864	6.955	5189.97	71206.3	1652.33	427.879	60.4403	88.7341	0	0	1	0	0	0
MNG	Mongolia	28.6	4.031	2.421	11840.8	86300	348.123	1161.39	65.479	79.8013	0	1	0	0	0	0
MAR	Morocco	29.6	6.769	4.209	7485.01	24782.8	376.92	231.935	68.3339	81.4321	1	0	0	0	0	0
MOZ	Mozambique	17.7	3.158	1.87	1136.1	4675.24	59.292	27.302	59.9657	33.0677	1	0	0	0	0	0
MMR	Myanmar	29.1	5.732	3.12	5591.6	8272.94	316.443	76.419	75.8323	66.4595	0	1	0	0	0	0
NAM	Namibia	22	3.552	2.085	9541.81	49112.5	1348.1	267.395	52.9667	42.848	1	0	0	0	0	0
NPL	Nepal	25	5.809	3.212	2442.8	26580.3	373.11	139.384	65.7798	59.8492	0	1	0	0	0	0
NLD	Netherlands	43.2	18.779	11.881	48472.5	118174	1079.65	757.458	60.4162	89.2953	0	0	1	0	0	0
NZL	New Zealand	37.9	15.322	9.72	36085.8	852.768	5.555	676.259	37.3095	89.9334	0	0	0	0	1	0
NGA	Nigeria	18.1	2.751	1.447	5338.45	962.693	12.621	14.177	57.6656	25.679	1	0	0	0	0	0
NOR	Norway	39.7	16.821	10.813	64800.1	33908.3	155.517	1403.14	53.07	87.1865	0	0	1	0	0	0
PAK	Pakistan	23.5	4.495	2.78	5034.71	5483.25	122.034	84.589	62.6957	56.7799	0	1	0	0	0	0
PAN	Panama	29.7	7.918	5.03	22267	106234	1641.42	874.181	73.9072	75.3094	0	0	0	1	0	0
PNG	Papua New Guinea	22.6	3.808	2.142	3823.19	2103.52	23.796	9.049	53.0779	59.3542	0	0	0	0	1	0
PRY	Paraguay	26.5	6.378	3.833	8827.01	63680.6	2235.43	252.706	64.7252	72.9771	0	0	0	0	0	1
PER	Peru	29.1	7.151	4.455	12236.7	65063.3	5970.01	161.213	70.5278	70.4289	0	0	0	0	0	1
PHL	Philippines	25.2	4.803	2.661	7599.19	21925.4	336.84	174.365	71.0605	67.2161	0	1	0	0	0	0
POL	Poland	41.8	16.763	10.202	27216.4	76748.5	1998.49	534.99	57.3367	90.3762	0	0	1	0	0	0
PRT	Portugal	46.2	21.502	14.924	27936.9	104729	1764.17	1787.71	64.7684	86.2288	0	0	1	0	0	0
QAT	Qatar	31.9	1.307	0.617	116936	80537.1	206.106	892.593	66.8524	71.9792	0	1	0	0	0	0
ROU	Romania	43	17.85	11.69	23313.2	61323.5	1880.2	647.952	57.7917	92.249	0	0	1	0	0	0
RUS	Russia	39.6	14.178	9.393	24766	49677.7	1355.84	1293.84	48.8465	87.6423	0	0	1	0	0	0
RWA	Rwanda	20.3	2.974	1.642	1854.21	7256.19	92.871	204.167	68.986	46.4105	1	0	0	0	0	0
SAU	Saudi Arabia	31.9	3.295	1.845	49045.4	15470.4	245.581	809.151	61.3016	71.9487	0	1	0	0	0	0
SEN	Senegal	18.7	3.008	1.796	2470.58	4286.15	107.756	46.526	40.3497	42.1009	1	0	0	0	0	0
SRB	Serbia	41.2	17.366		14048.9	131238	1164.8	808.033	52.8637	94.298	0	0	1	0	0	0
SGP	Singapore	42.4	12.922	7.049	85535.4	14052	11.871	3240.5	50.9	75.7505	0	1	0	0	0	0
SVK	Slovakia	41.2	15.07	9.167	30155.2	74336.5	2305.92	7632.22	55.1103	89.1915	0	0	1	0	0	0
SVN	Slovenia	44.5	19.062	12.93	31400.8	138199	2174.89	746.975	53.9902	88.5043	0	0	1	0	0	0
ZAF	South Africa	27.3	5.344	3.053	12294.9	48167.6	1443.24	291.353	57.3028	50.3105	1	0	0	0	0	0
KOR	South Korea	43.4	13.914	8.622	35938.4	5752.48	47.442	255.653	53.2344	79.9542	0	1	0	0	0	0
SSD	South Sudan	19.2	3.441	2.032	1569.89	1045.48	11.246	14.451	58.0933	25.2823	1	0	0	0	0	0
ESP	Spain	45.5	19.436	13.799	34272.4	105762	1843.72	1231.14	61.0238	91.2595	0	0	1	0	0	0
LKA	Sri Lanka	34.1	10.069	5.331	11669.1	23725.8	579.049	243.033	61.439	82.6731	0	1	0	0	0	0
CHE	Switzerland	43.1	18.436	12.644	57410.2	95448.5	1266.02	1163.8	51.0576	89.7084	0	0	1	0	0	0
THA	Thailand	40.1	11.373	6.89	16277.7	21795.5	227.074	189.541	50.4499	73.8175	0	1	0	0	0	0
TLS	Timor	18	3.556	1.897	6570.1	14334.7	81.109	144.632	50.79	48.3679	0	1	0	0	0	0
TGO	Togo	19.4	2.839	1.525	1429.81	2947.07	25.477	59.498	52.3345	38.2115	1	0	0	0	0	0
TTO	Trinidad and Tobago	36.2	10.014	5.819	28763.1	35230.8	1023.96	237.66	72.3566	82.367	0	0	0	1	0	0
TUN	Tunisia	32.7	8.001	5.075	10849.3	58903.6	2067.4	241.358	60.2149	84.1576	1	0	0	0	0	0
TUR	Turkey	31.6	8.153	5.061	25129.3	81844.3	735.207	985.476	64.4299	88.7629	0	1	0	0	0	0
UGA	Uganda	16.4	2.168	1.308	1697.71	2601.48	66.57	35.224	67.3916	30.9852	1	0	0	0	0	0
UKR	Ukraine	41.4	16.462	11.133	7894.39	56982.5	1354.94	289.722	60.8729	90.9318	0	0	1	0	0	0
ARE	United Arab Emirates	34	1.144	0.526	67293.5	73462.7	208.486	8189.09	55.1595	71.64	0	1	0	0	0	0
GBR	United Kingdom	40.8	18.517	12.527	39753.2	111449	1996.21	3907.16	62.7276	88.49	0	0	1	0	0	0
USA	United States	38.3	15.413	9.732	54225.4	128178	2055.63	1692.03	59.3875	88.0428	0	0	0	1	0	0
URY	Uruguay	35.6	14.655	10.361	20551.4	111384	1735.65	1012.02	57.3494	85.424	0	0	0	0	0	1
VNM	Vietnam	32.6	7.15	4.718	6171.88	7420.23	183.531	204.151	64.6605	80.4074	0	1	0	0	0	0
ZMB	Zambia	17.7	2.48	1.542	3689.25	11031.1	192.435	127.78	45.5254	33.1975	1	0	0	0	0	0
ZWE	Zimbabwe	19.6	2.822	1.882	1899.78	8556.36	304.794	81.822	70.9682	36.9465	1	0	0	0	0	0
